# Supplementary material for: DHRS2 inhibits cell growth and metastasis in ovarian cancer by downregulation of CHKα to disrupt choline metabolism
Source: PubMed Central journal article supplement (PMC9530226; doi:10.1038/s41419-022-05291-w), 2022-10-03

Figure 1 A

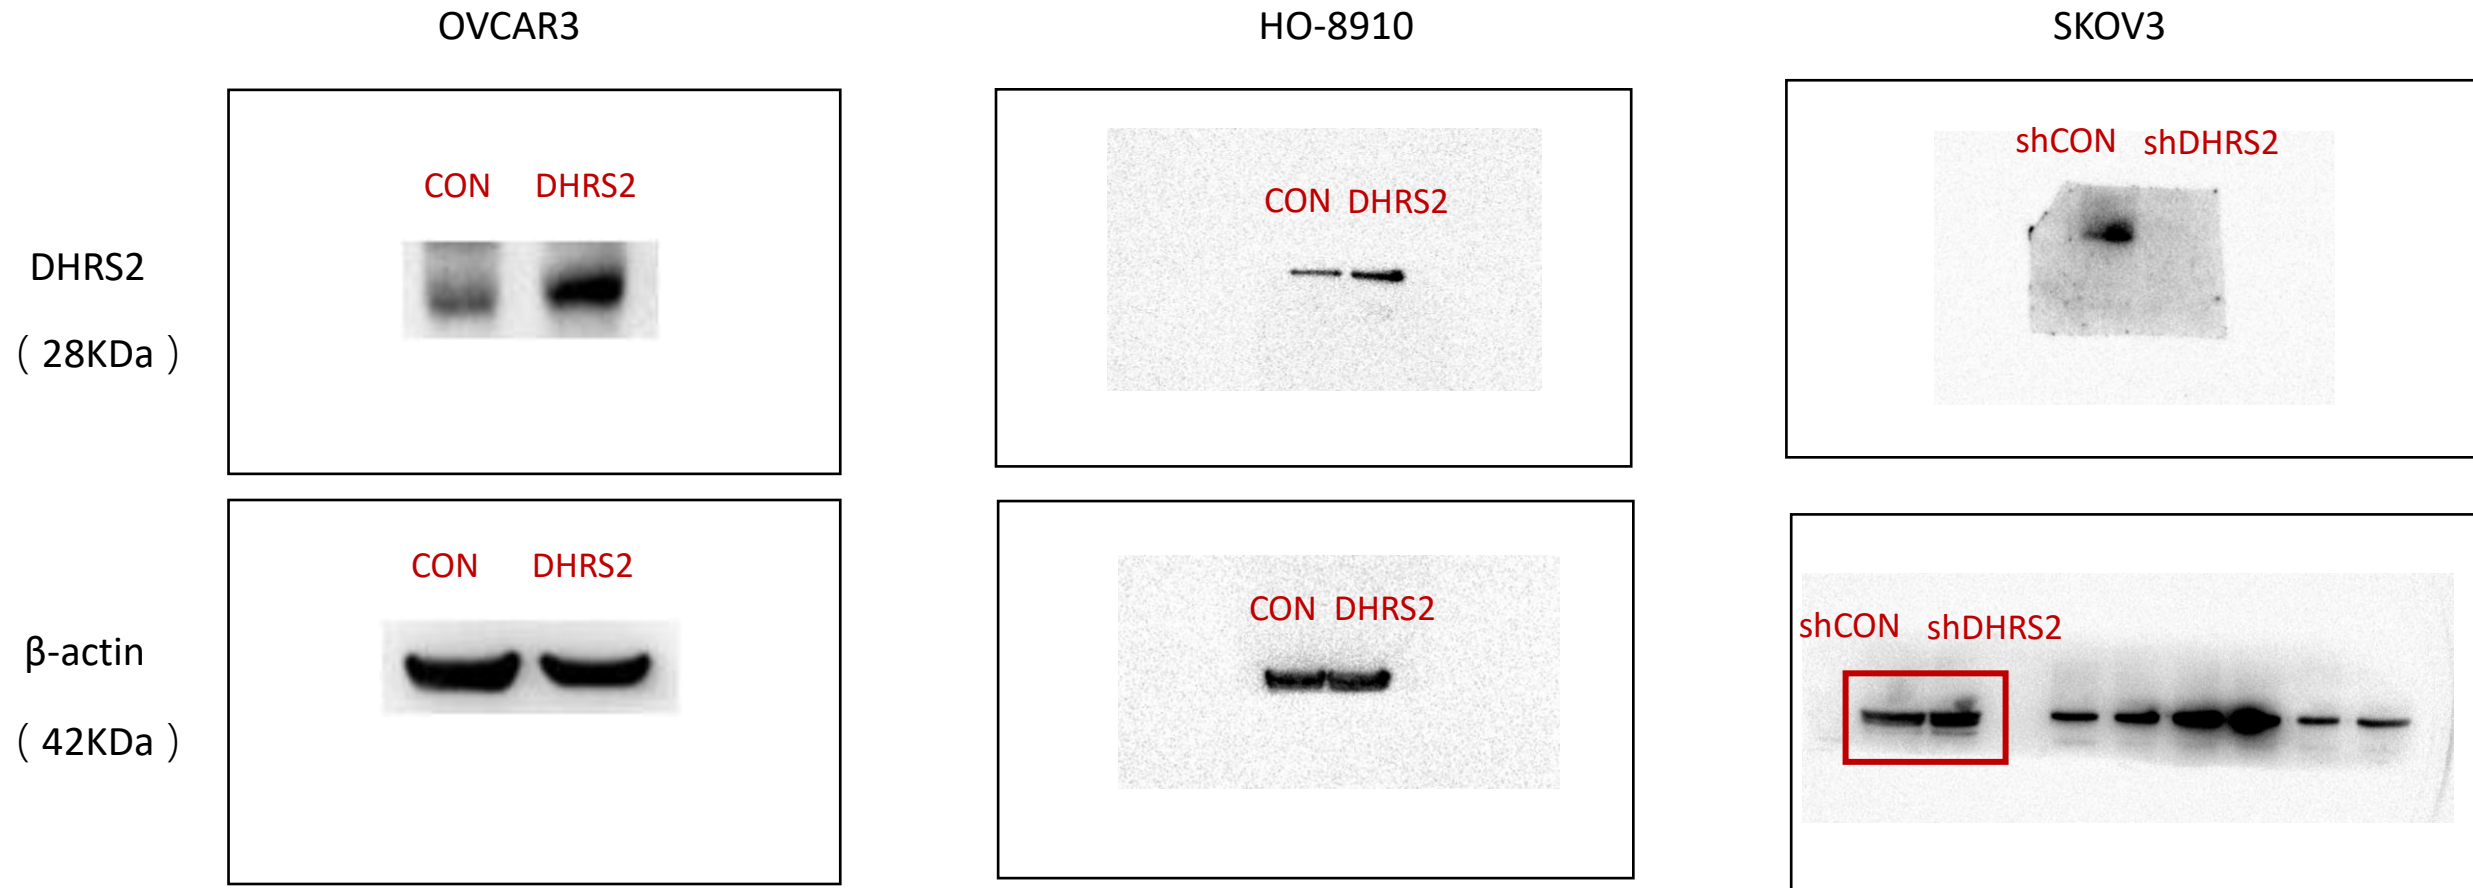

Figure 3 D

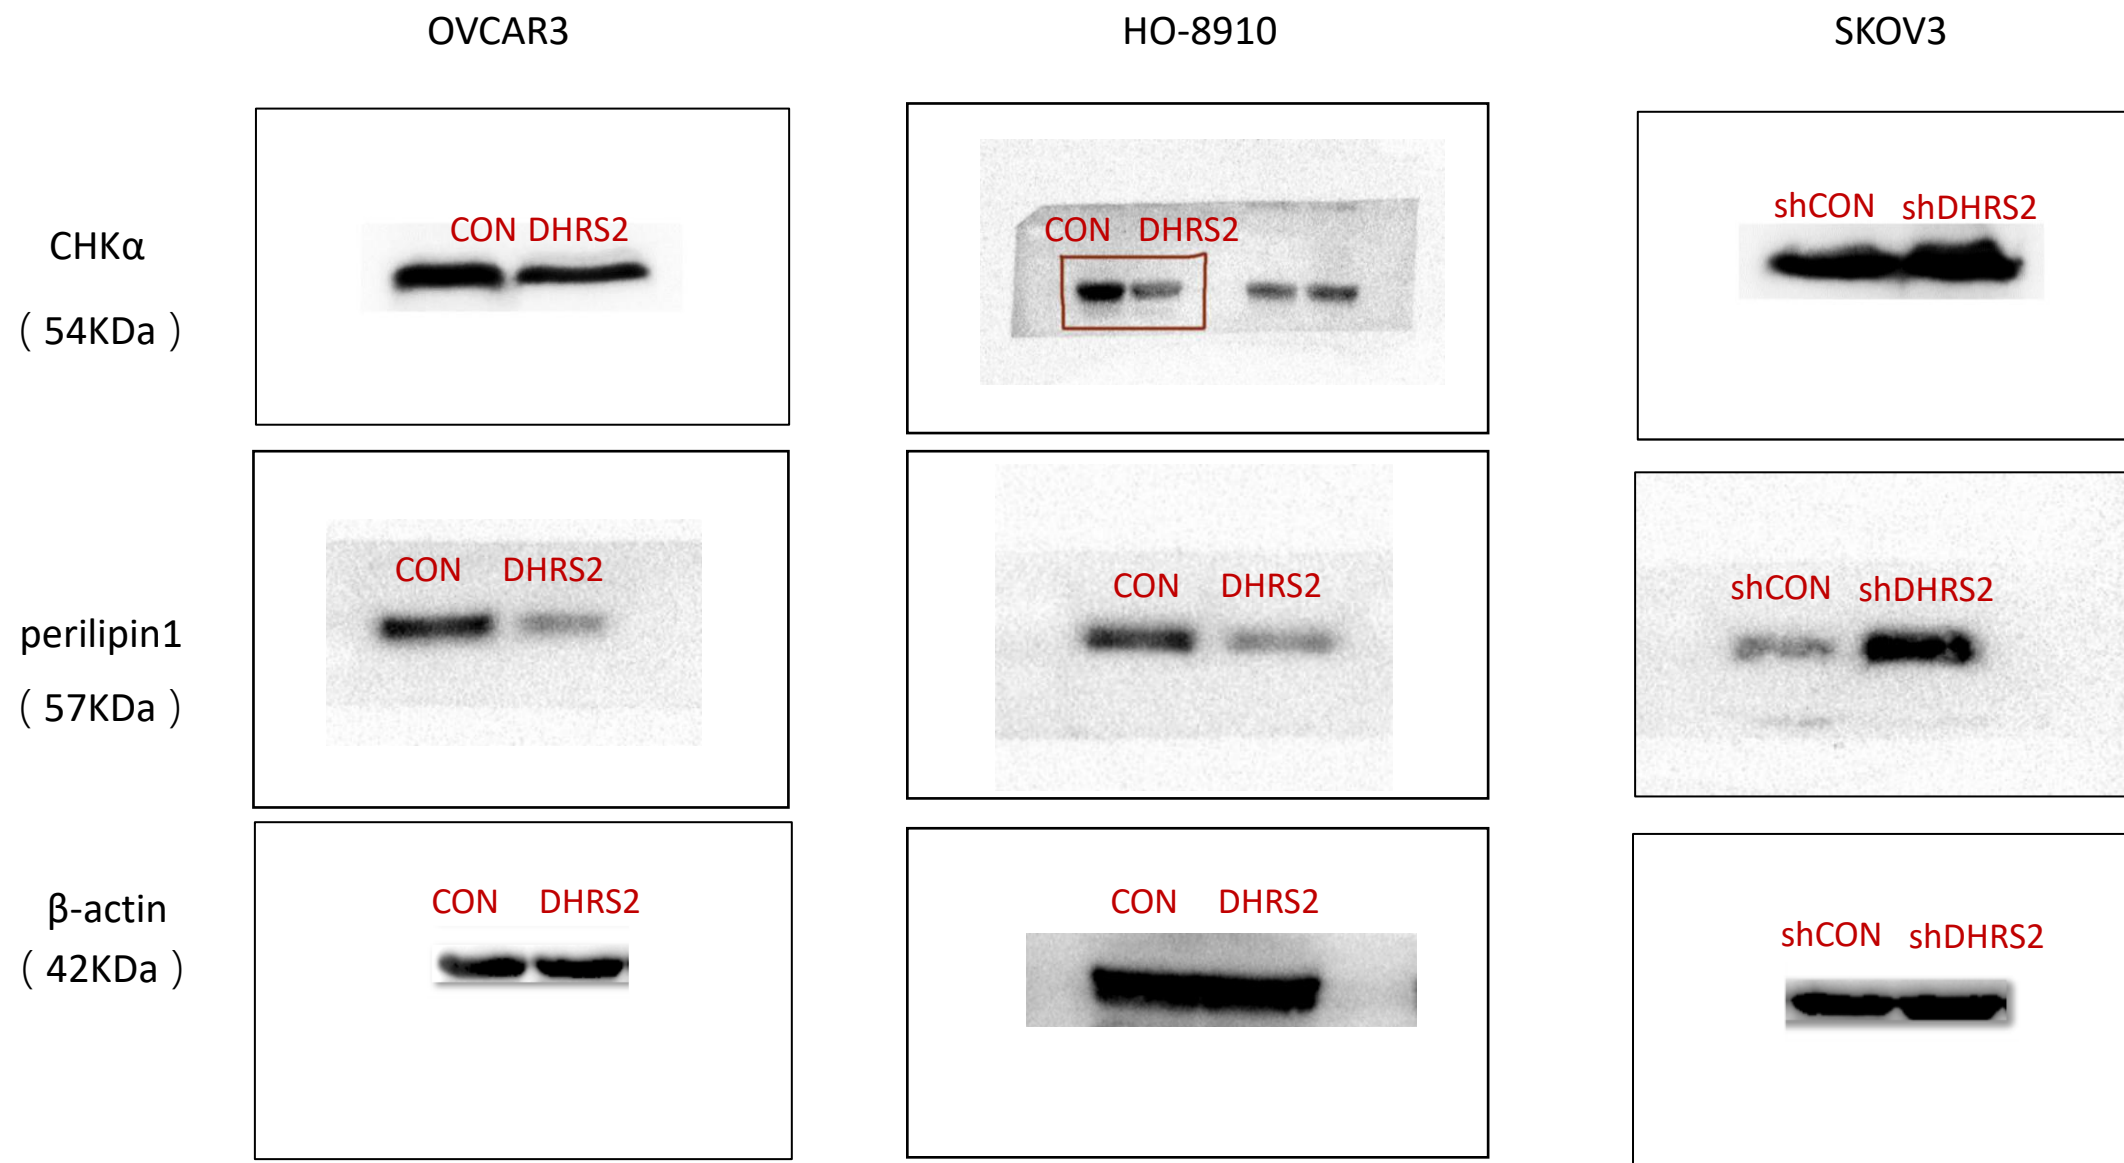

# Figure 4 A

OVCAR3

CHK $\alpha$   
( 54KDa )

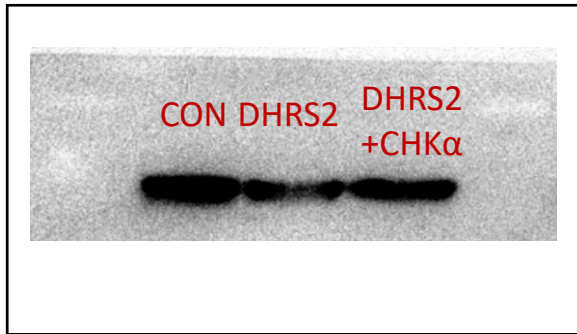

$\beta$ -actin  
( 42KDa )

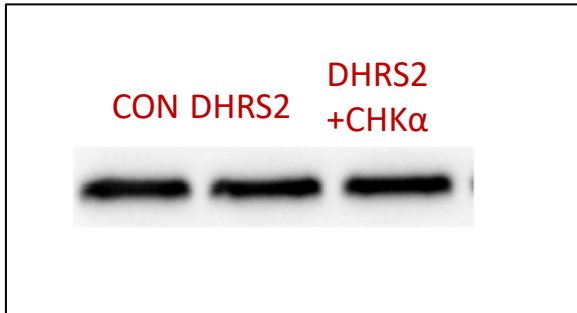

HO-8910

CHK $\alpha$   
( 54KDa )

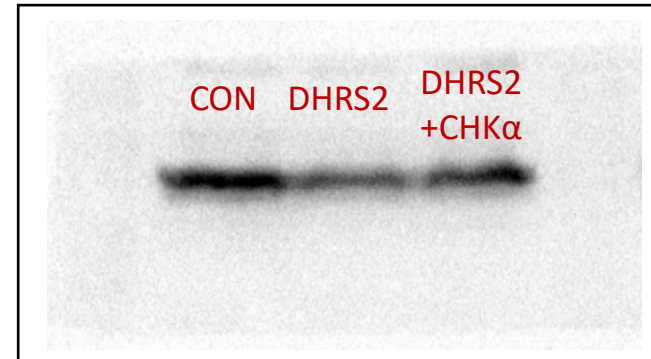

$\beta$ -actin  
( 42KDa )

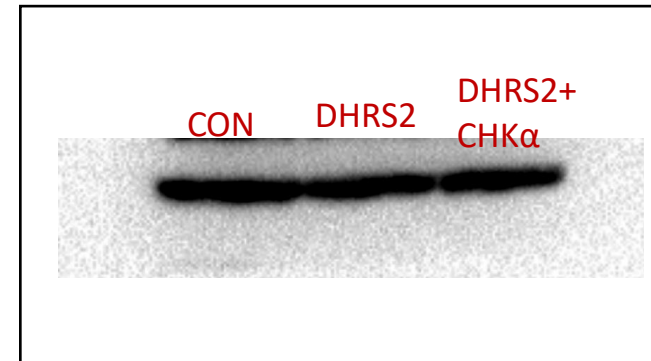

Figure 4 D

OVCAR3

P-AKT  
( 62KDa )

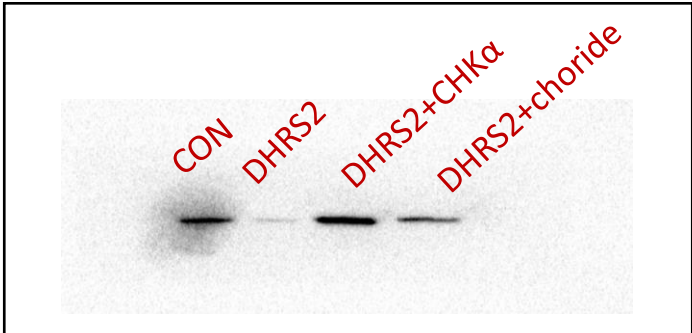

perilipin1  
( 57KDa )

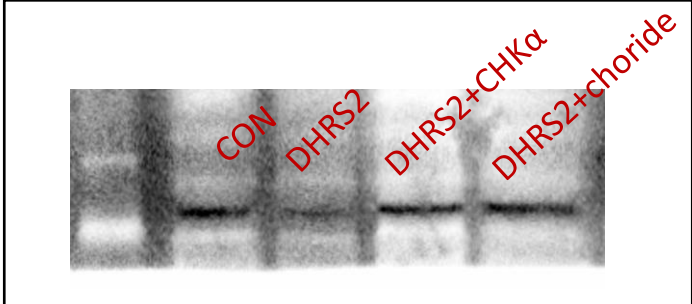

β-actin  
( 42KDa )

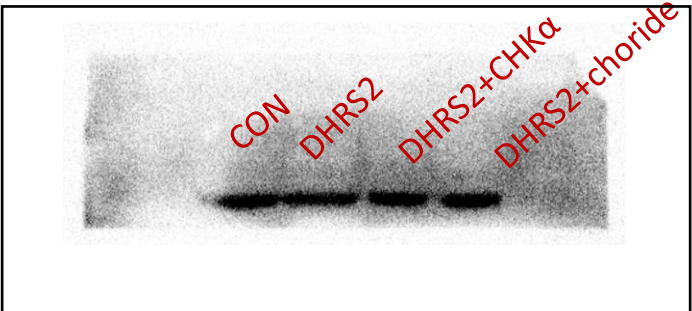

HO-8910

P-AKT  
( 62KDa )

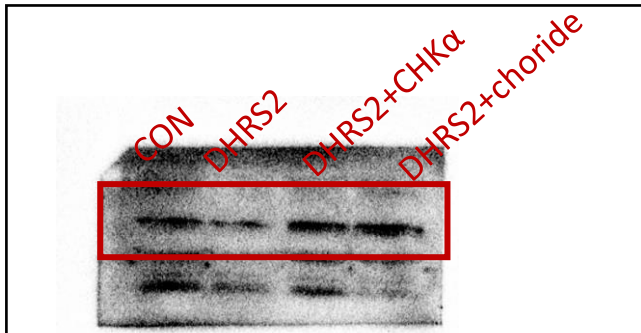

perilipin1  
( 57KDa )

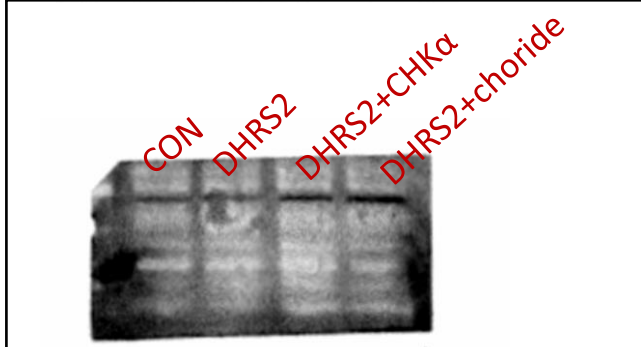

β-actin  
( 42KDa )

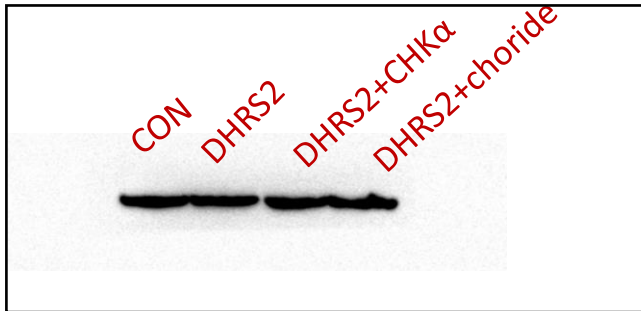

Figure 5 F

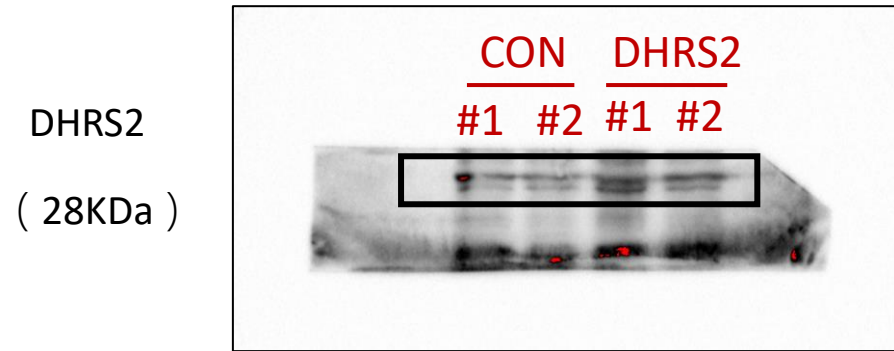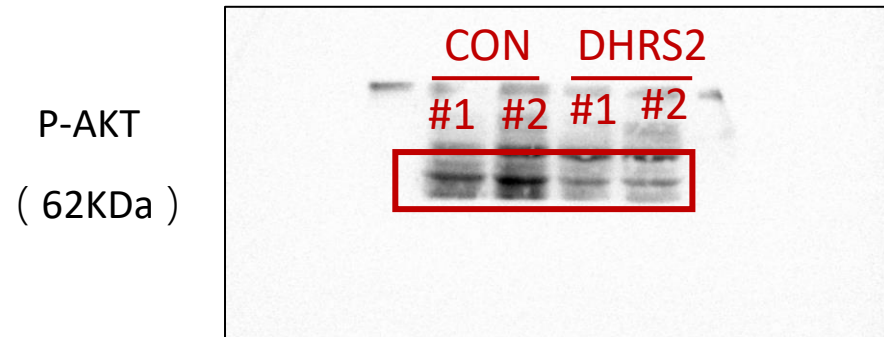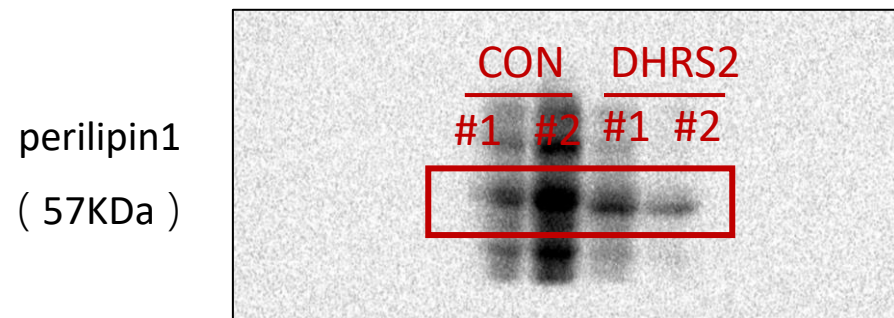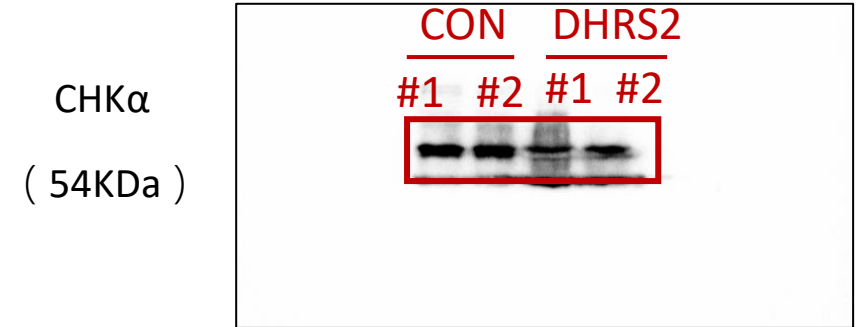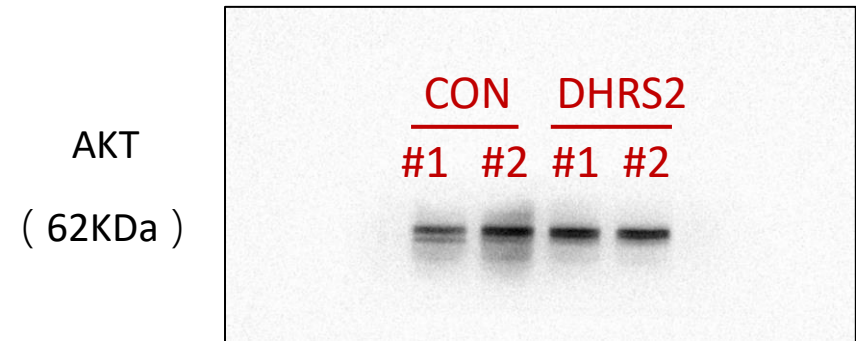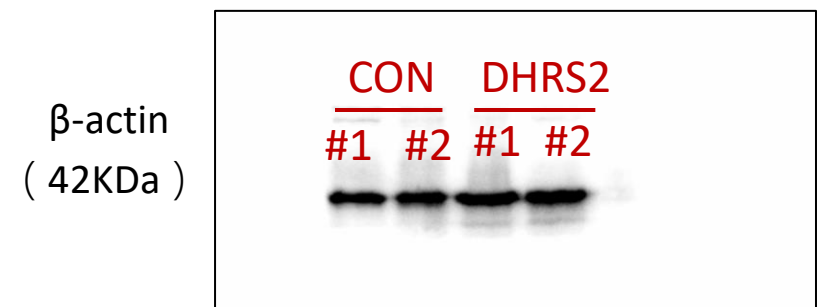

Figure 6 F

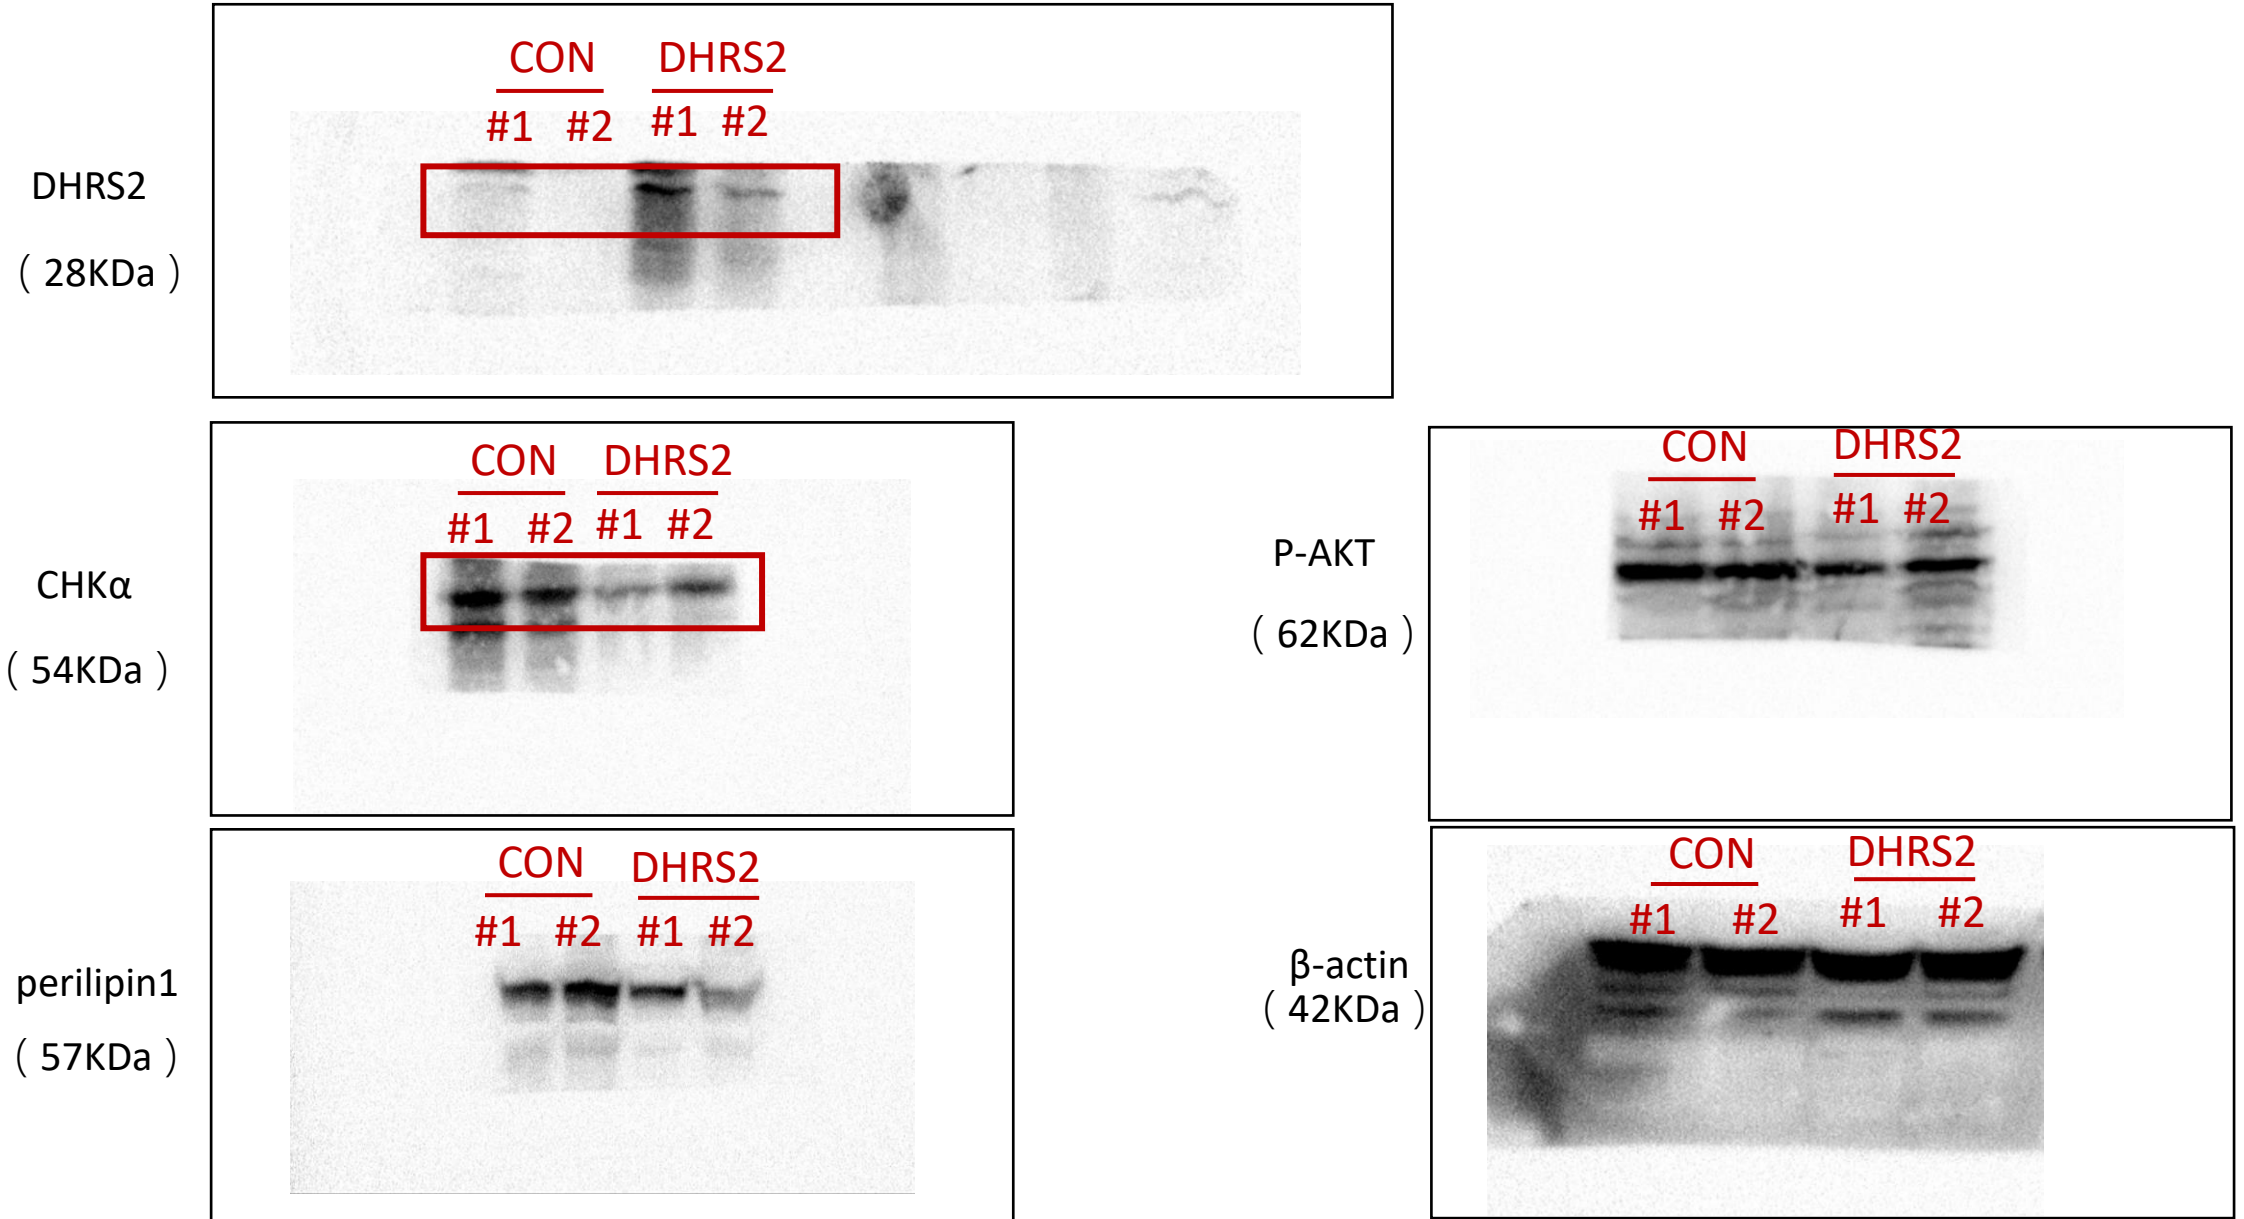

# Supplement Figure 1

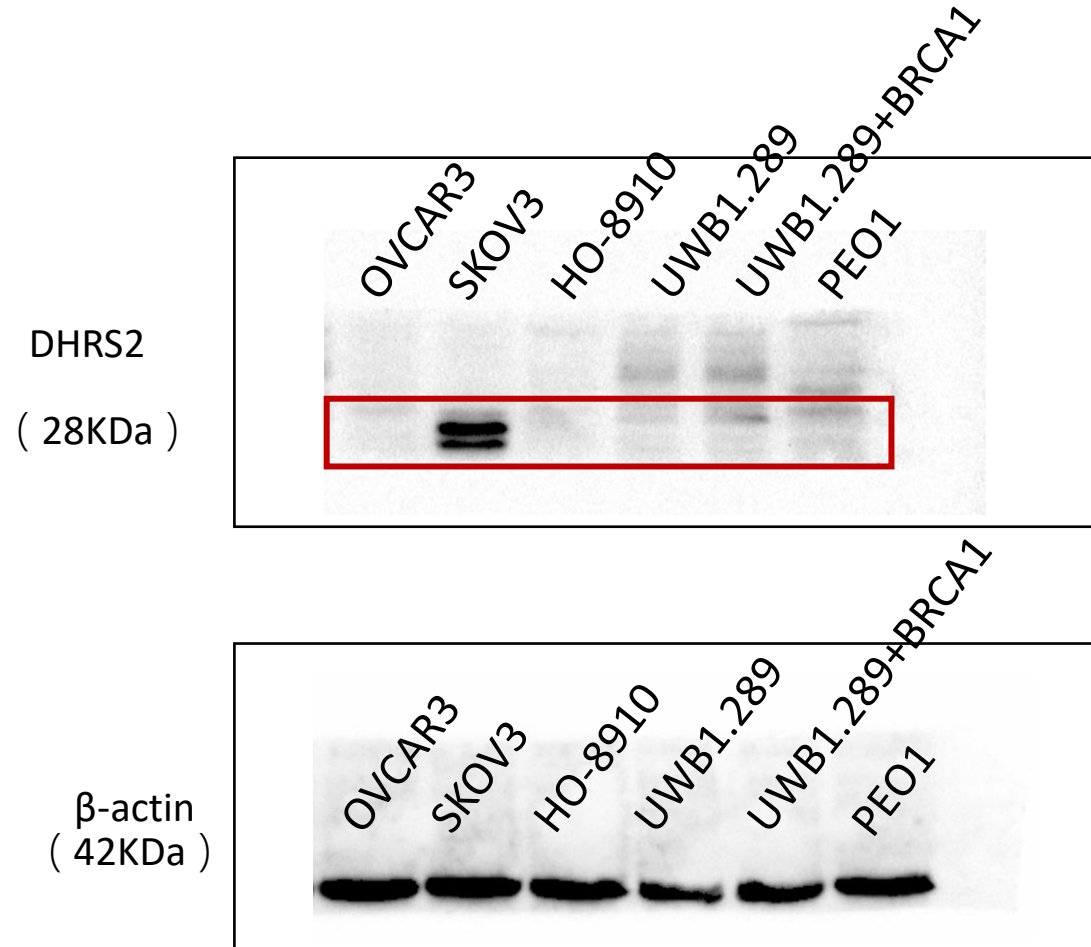

Supplement: 41419_2022_5291_MOESM7_ESM.pdf [file 41419_2022_5291_MOESM7_ESM.pdf]
